# Supplementary material
Source: PubMed Central journal article supplement (PMC3190934)
Supplement: supp_M111.227678_jbc.M111.227678-1.pdf [file supp_M111.227678_jbc.M111.227678-1.pdf]

Supplemental Figure 1

Diagram

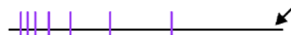

Original AP trace

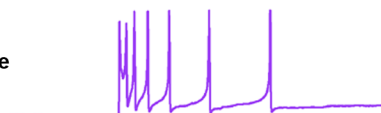

Blue light (10ms)

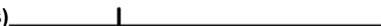

*Zxls6*

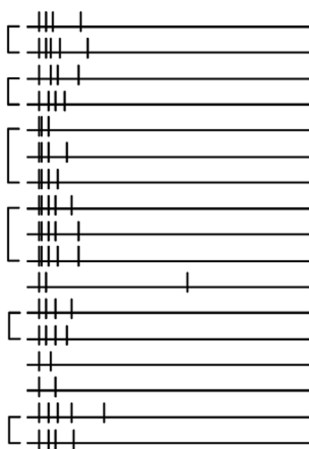

*Zxls6;slo-1*

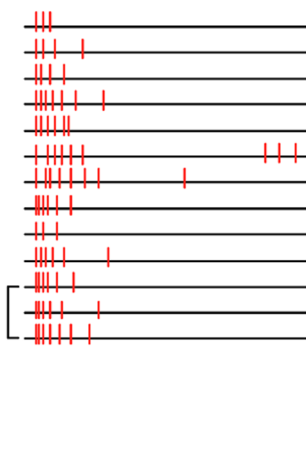

*Zxls6;dys-1*

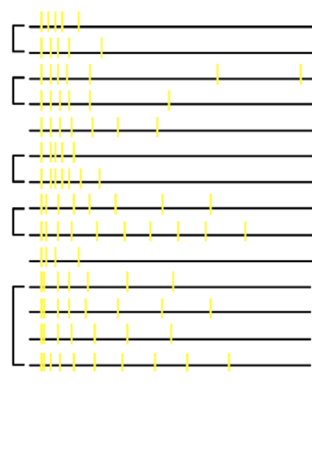

0.5 s

*Zxls6;dys-1*

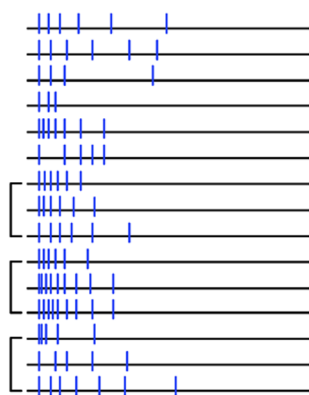

*Zxls6;dyc-1*

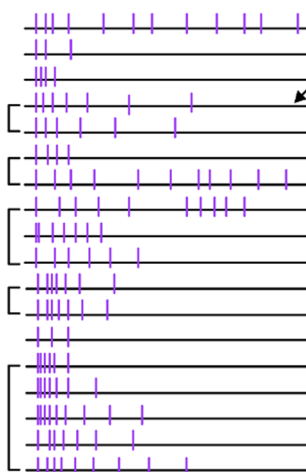

*Zxls6;stn-1*

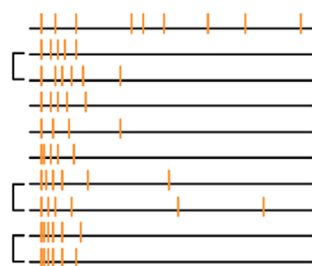

### **Supplemental Figure 1**

**S1. All AP traces from current-clamped muscle cells of SLO-1(lf) and DAPC(lf) mutants following photostimulation.** (A) Representative trace of photoevoked APs in current-clamped muscle of DAPC mutant *dyc-1(cx32)*, with corresponding temporal representation of APs as a function of time (~2.5 sec total) following blue light stimulation of cholinergic neurons of the ventral nerve cord. (B) Temporal representation of all individual AP recordings from muscle cells at the NMJ of SLO-1(lf) and DAPC(lf) mutants over a period of ~2.5 sec following photostimulation. The arrow denotes the trace depicted in S1A.
